# Supplementary material for: Colliding heavy nuclei take multiple identities on the path to fusion
Source: PubMed Central journal article supplement (PMC10693600; doi:10.1038/s41467-023-43817-8), 2023-12-02
Supplement: 41467_2023_43817_MOESM1_ESM.pdf [file 41467_2023_43817_MOESM1_ESM.pdf]

# Colliding heavy nuclei take multiple identities on the path to fusion

## Supplementary Information

K.J. Cook<sup>1,2\*</sup>, D.C. Rafferty<sup>1</sup>, D.J. Hinde<sup>1</sup>, E.C. Simpson<sup>1</sup>, M. Dasgupta<sup>1</sup>, L. Corradi<sup>3</sup>, M. Evers<sup>1</sup>, E. Fioretto<sup>3</sup>, D.Y. Jeung<sup>1</sup>, N. Lobanov<sup>1</sup>, D.H. Luong<sup>1</sup>, T. Mijatović<sup>4</sup>, G. Montagnoli<sup>5</sup>, A.M. Stefanini<sup>3</sup> and S. Szilner<sup>4</sup>

<sup>1</sup>Department of Nuclear Physics and Accelerator Applications, Research School of Physics, The Australian National University, Canberra, 2601, ACT, Australia.

<sup>2</sup>Facility for Rare Isotope Beams, Michigan State University, East Lansing, 48824, Michigan, USA.

<sup>3</sup>Istituto Nazionale di Fisica Nucleare, Laboratori Nazionali di Legnaro, Legnaro, I-35020 Italy.

<sup>4</sup>Ruđer Bošković Institute, Zagreb, HR-10001, Croatia.

<sup>5</sup>Dipartimento di Fisica e Astronomia, Università di Padova, via Marzolo 8, Padova, I-35131, Italy.

\*Corresponding author. E-mail: [kaitlin.cook@anu.edu.au](mailto:kaitlin.cook@anu.edu.au);

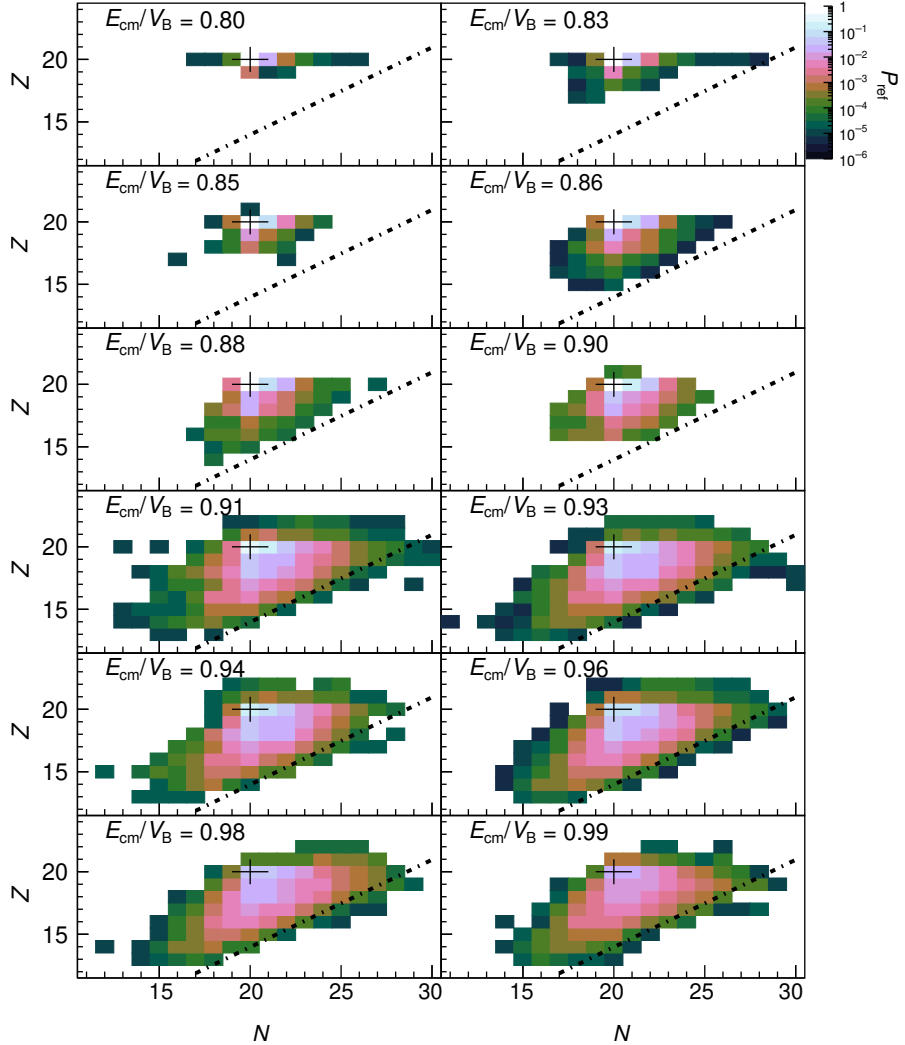

**Supplementary Fig. 1**  $Z$  and  $N$  distribution of reflected nuclei produced in reactions of  $^{40}\text{Ca}+^{208}\text{Pb}$  at  $\theta_{lab} = 115^\circ$  at measured energies from  $E_{cm}/V_B = 0.81$  to 0.99. The common colour scale indicates the probability of forming each nucleus. The location of  $^{40}\text{Ca}$  is indicated with the cross. Diagonal lines indicate the isospin asymmetry equal to that of the compound nucleus  $^{248}\text{No}$  ( $N/Z = 1.43$ )

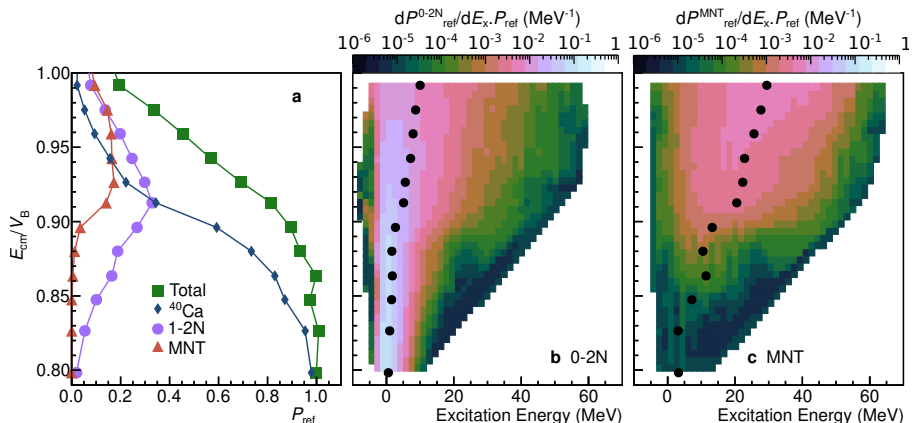

**Supplementary Fig. 2** (a) Absolute probability of reflected flux for all reflected flux (green squares), (in)elastic scattering ( $^{40}\text{Ca}$ , blue diamonds), 1-2N transfer (purple circles), and multi-nucleon transfer (MNT, orange triangles) as a function of  $E/V_B$ . Statistical errors are smaller than the points. (b) Evolution of excitation energy with increasing  $E/V_B$  (decreasing separation) for the sum of in(elastic) scattering and 1-2N transfer, denoted “0-2N” and (c) for MNT. The points show the mean excitation energy at each measured energy. The colour axis indicates  $P_{ref}^{0-2N}/P_{ref}$  and  $P_{ref}^{MNT}/P_{ref}$ , for panels (b) and (c) respectively. The data has been interpolated between measurement energies using Delaunay triangulation [1].

**Supplementary Table 1** Centre-of-mass energies, barrier height  $V_B$  (incorporating the centrifugal potential for the  $\ell$  value at  $115^\circ$ , distance of closest approach relative to the barrier and energy with respect to the barrier.

| Energy (MeV) | $V_B$ ( $\theta_{lab} = 115^\circ$ ) (MeV) | $R_{min} - R_B$ | $E_{cm}/V_B$ |
|--------------|--------------------------------------------|-----------------|--------------|
| 156.7        | 196.3                                      | 3.87            | 0.80         |
| 161.8        | 195.8                                      | 3.35            | 0.83         |
| 165.6        | 195.4                                      | 3.00            | 0.85         |
| 168.5        | 195.1                                      | 2.73            | 0.86         |
| 171.5        | 194.9                                      | 2.45            | 0.88         |
| 174.4        | 194.6                                      | 2.20            | 0.90         |
| 177.4        | 194.4                                      | 1.93            | 0.91         |
| 179.9        | 194.0                                      | 1.71            | 0.93         |
| 182.8        | 193.7                                      | 1.45            | 0.94         |
| 185.8        | 193.5                                      | 1.16            | 0.96         |
| 188.7        | 193.3                                      | 0.86            | 0.98         |
| 191.7        | 193.1                                      | 0.46            | 0.99         |

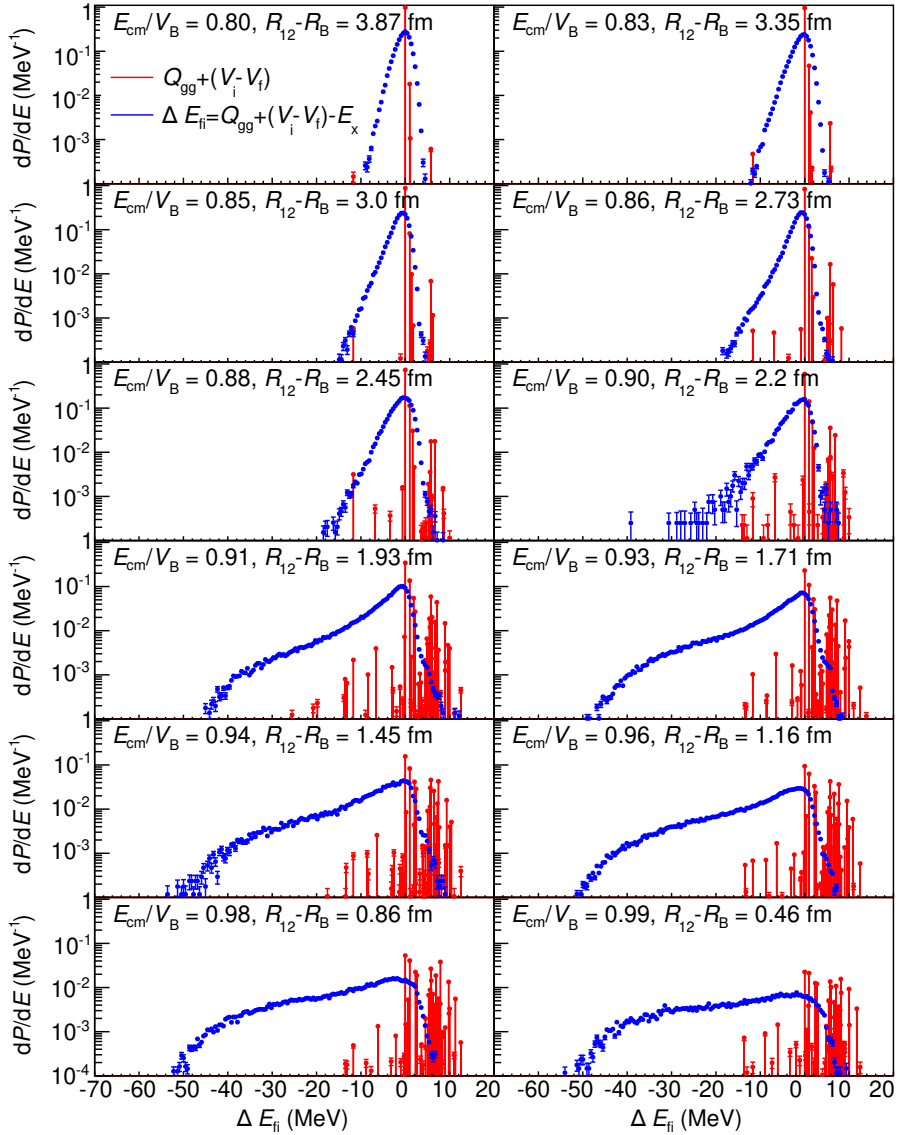

**Supplementary Fig. 3** Distribution of kinetic energies with respect to the new potential following transfer at all measured energies. The blue curve shows the distribution including the measured excitation energy (i.e.  $Q_{gg} + (V_i - V_f) - E_x$ ), where the red lines show the positions of ground-state to ground-state transfers (i.e.  $Q_{gg} + (V_i - V_f)$ ). Error bars are statistical.

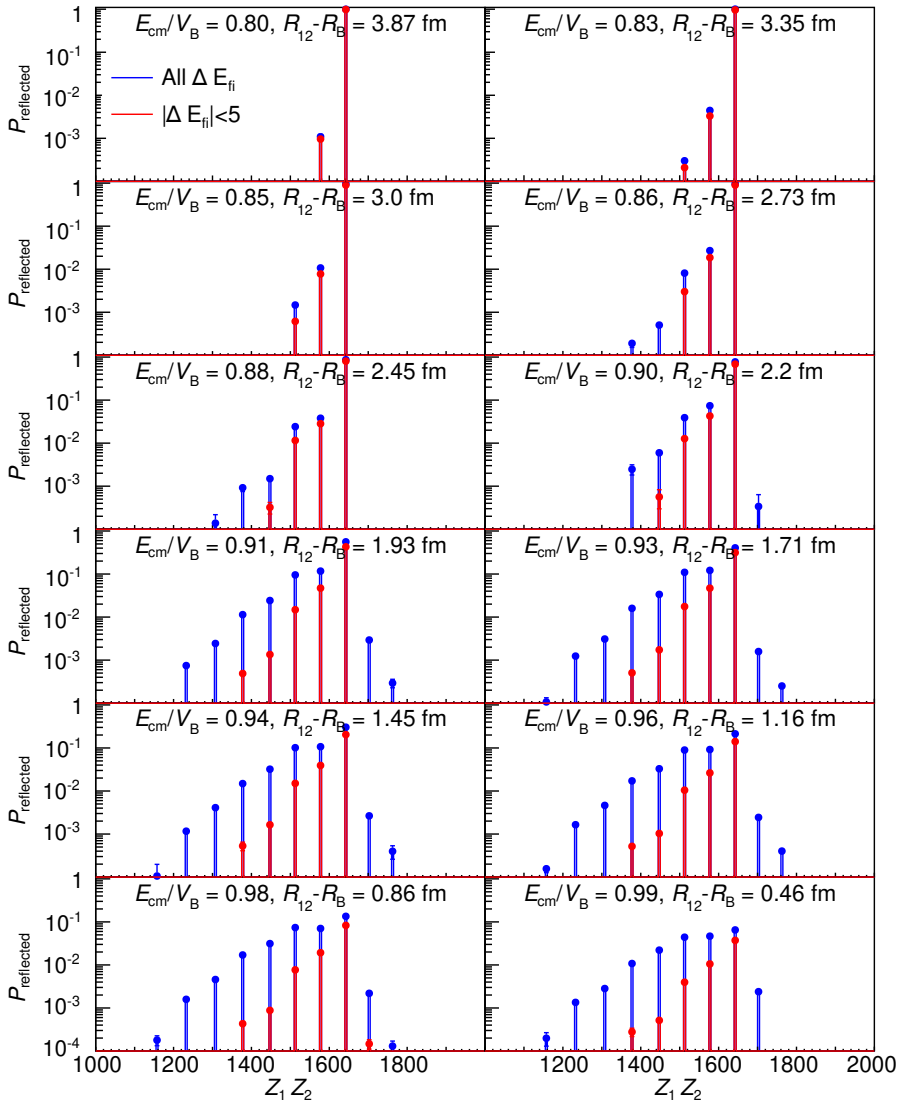

**Supplementary Fig. 4** Distribution of reflected flux probabilities in exit channel  $Z_1 Z_2$  at all measured energies. The red curve shows the distribution including only those nuclides with energies with respect to the barrier similar to the entrance channel, i.e.  $|\Delta E_{fi}| < 5$ , where the blue lines show the distribution of  $Z_1 Z_2$  of the entire reflected flux. Error bars are statistical and mostly smaller than the size of each point.

## **Supplementary References**

- [1] Delaunay, B. Sur la sphère vide. a la mémoire de georges voronoï. *Bulletin de l'Académie des Sciences de l'URSS. Classe des sciences mathématiques et na* 793–800 (1934) .
